# Supplementary material for: Mortality Outcomes Associated with Vascular Access Types in Hemodialysis for ESRD: A Systematic Review and Meta-Analysis
Source: Research Square preprint supplement (doi:10.21203/rs.3.rs-7165622/v1), 2025-08-11

Fig 1 Catheters vs Fistula- Forest map


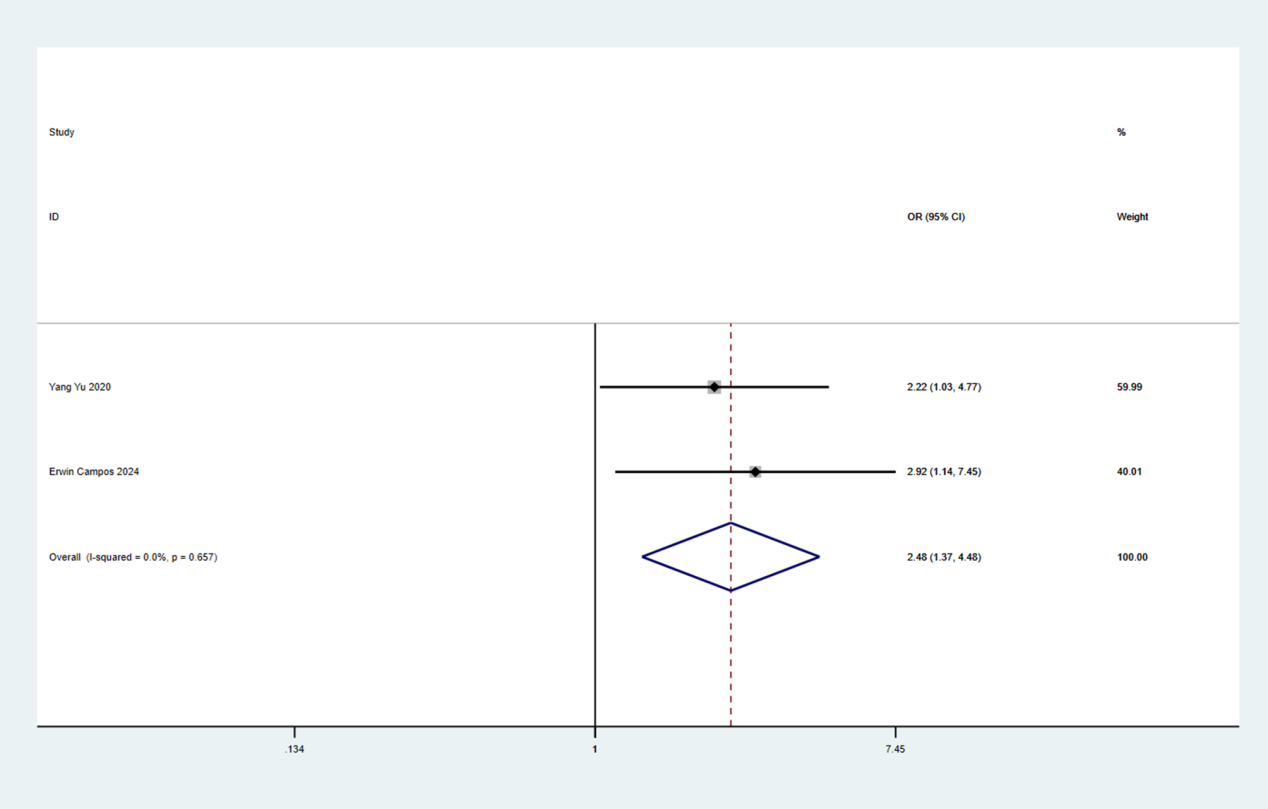


Fig 2 Catheters vs Fistula- Egger’s test


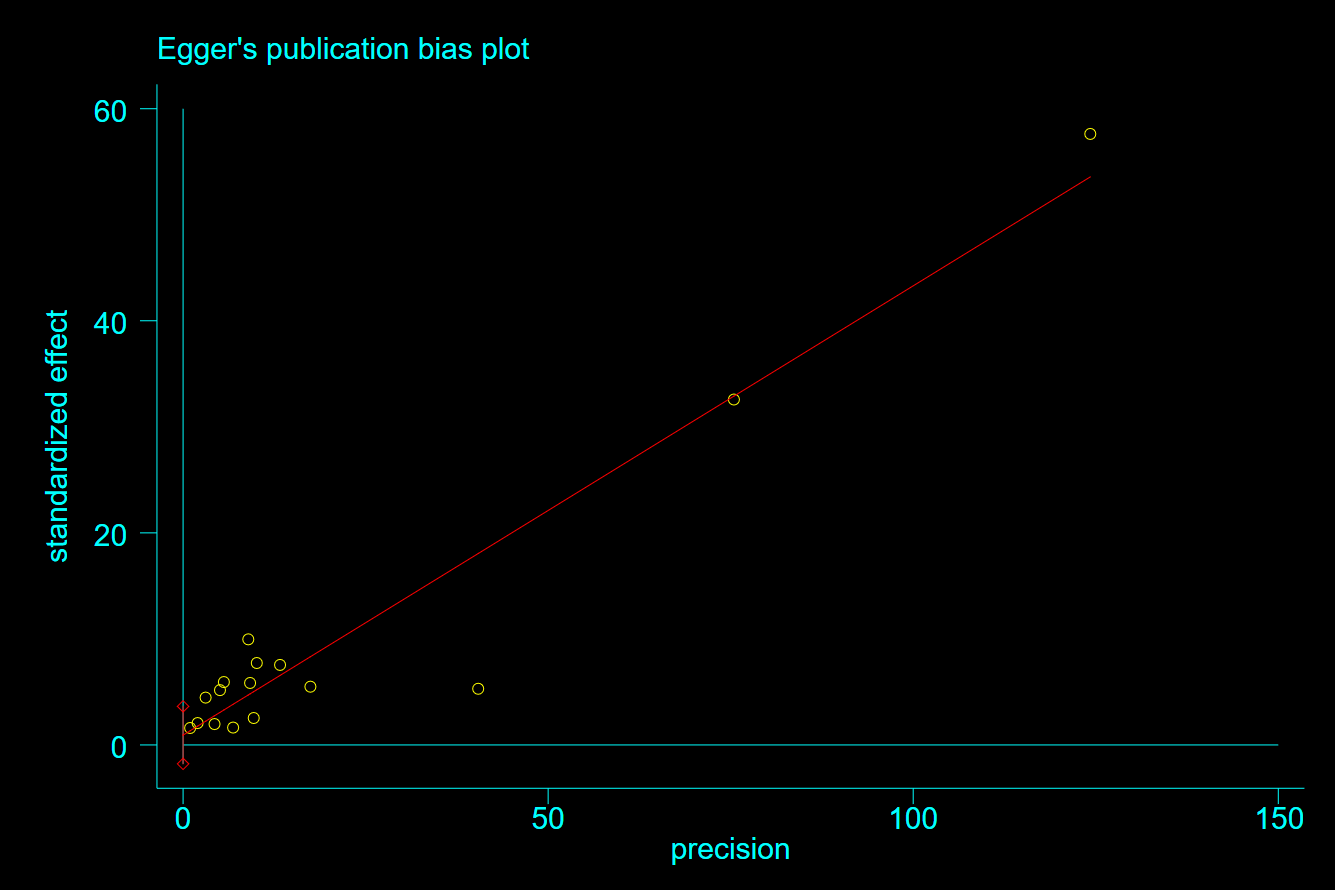


Fig 3 Catheters vs Fistula- Funnel plot


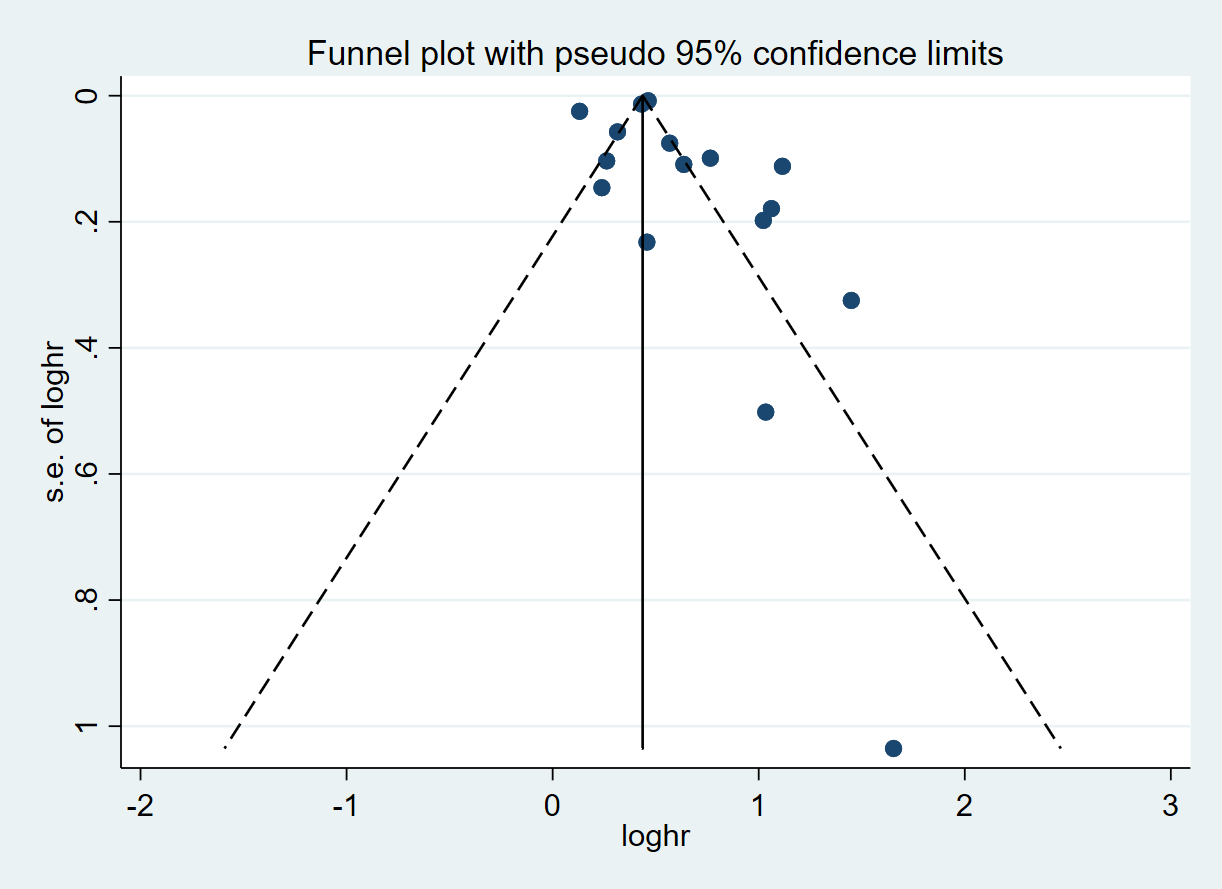


Fig 4 Catheters vs Fistula- Sensitivity analysis


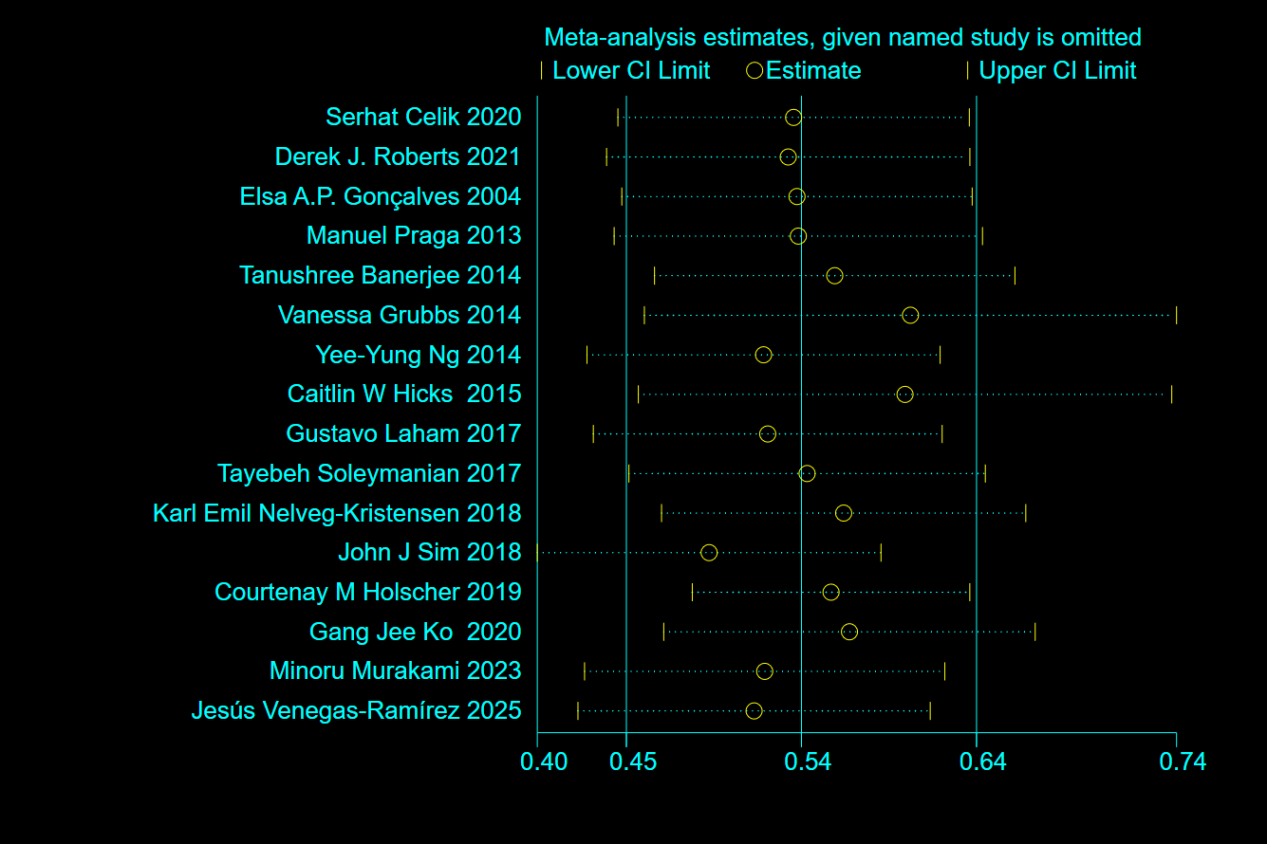


Fig 5 Graft vs Fistula - Forest map


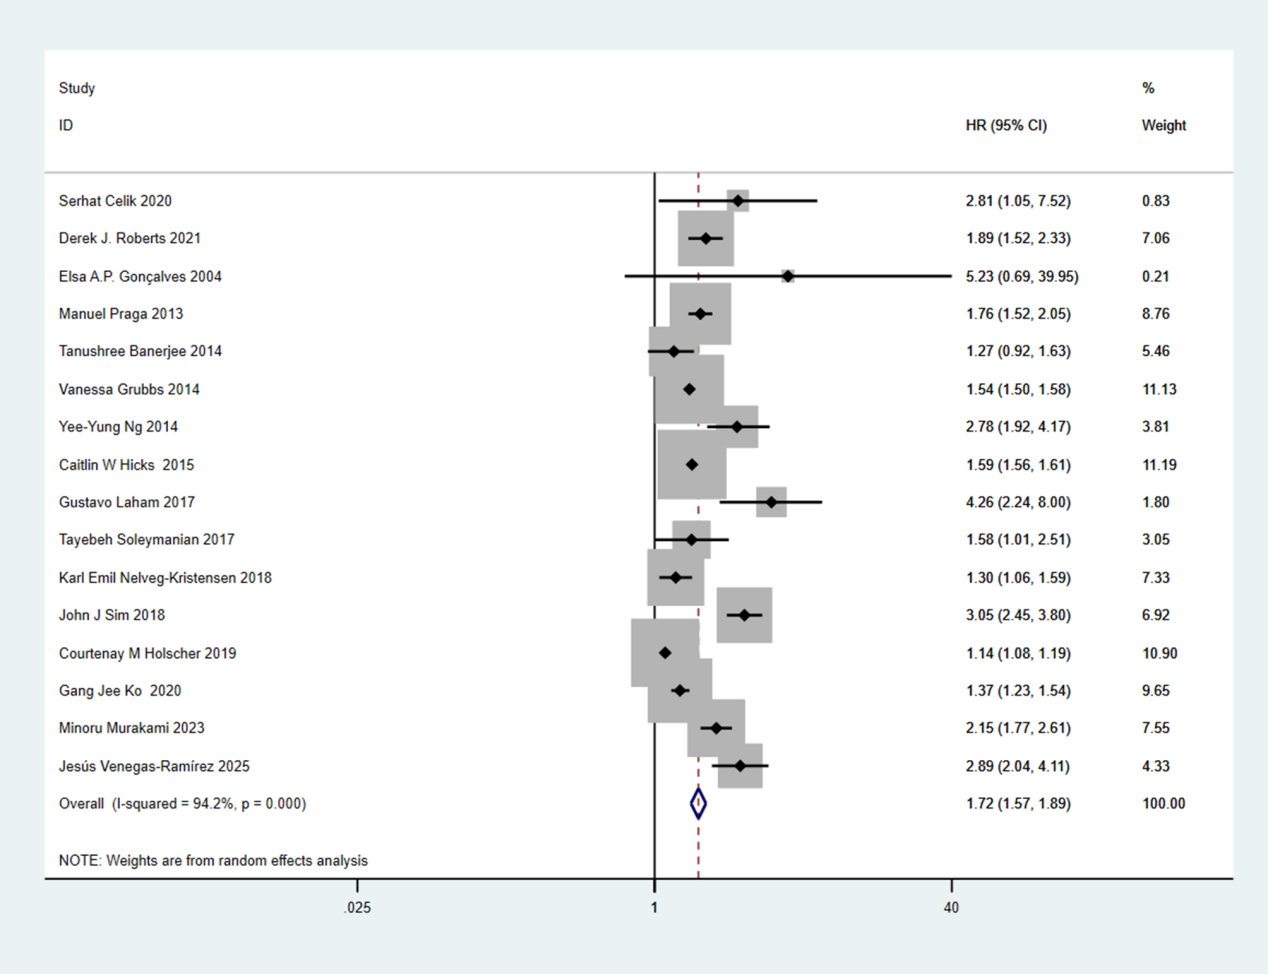


Fig 6 Graft vs Fistula - Egger’s test


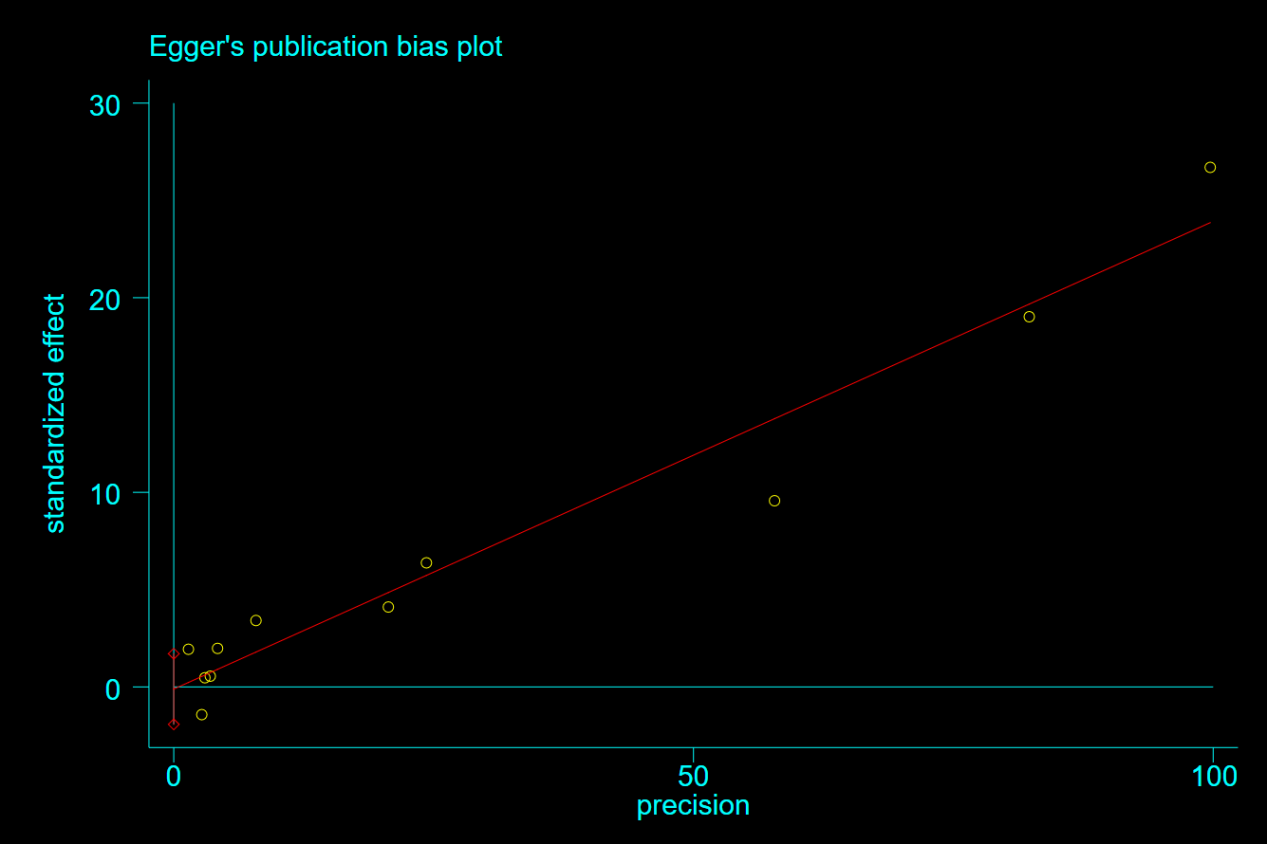


Fig 7 Graft vs Fistula - Funnel plot


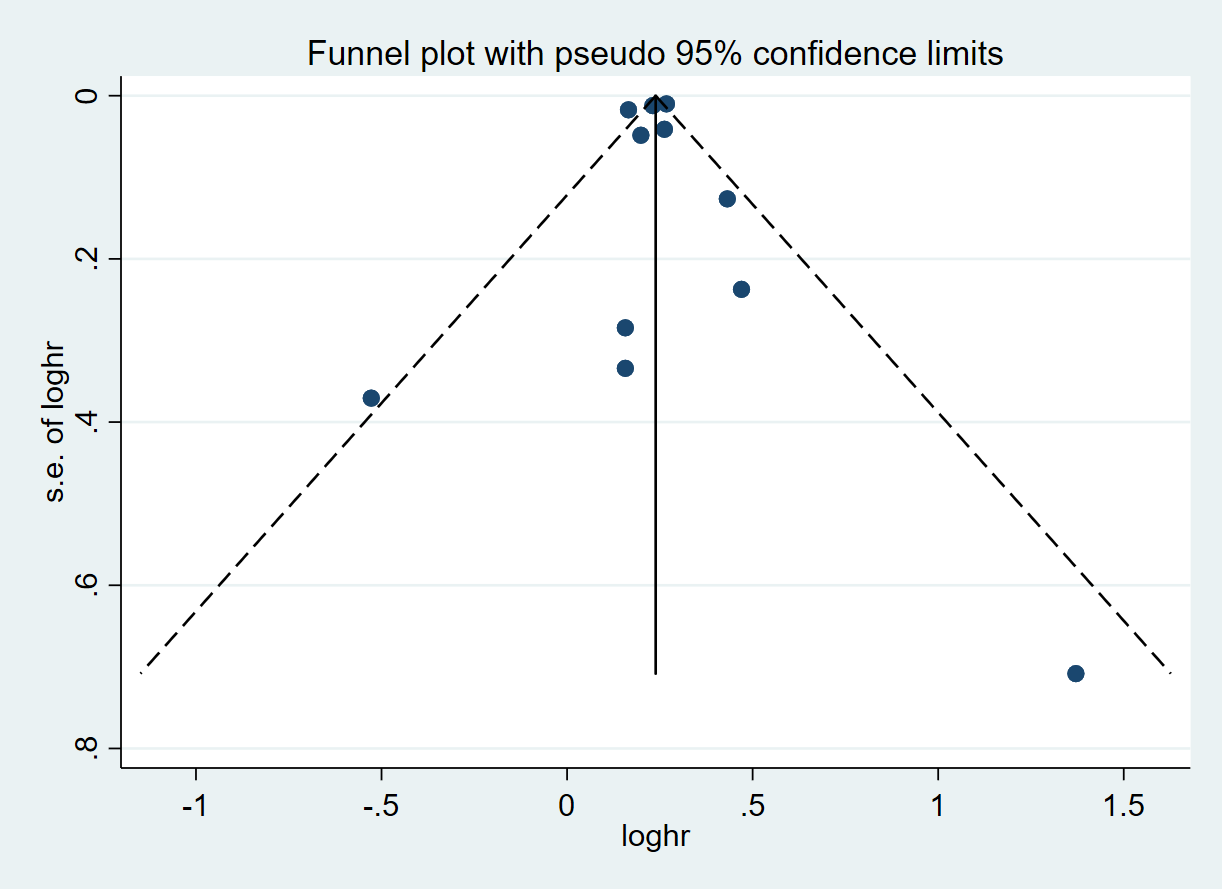


Fig 8 Graft vs Fistula - Sensitivity analysis


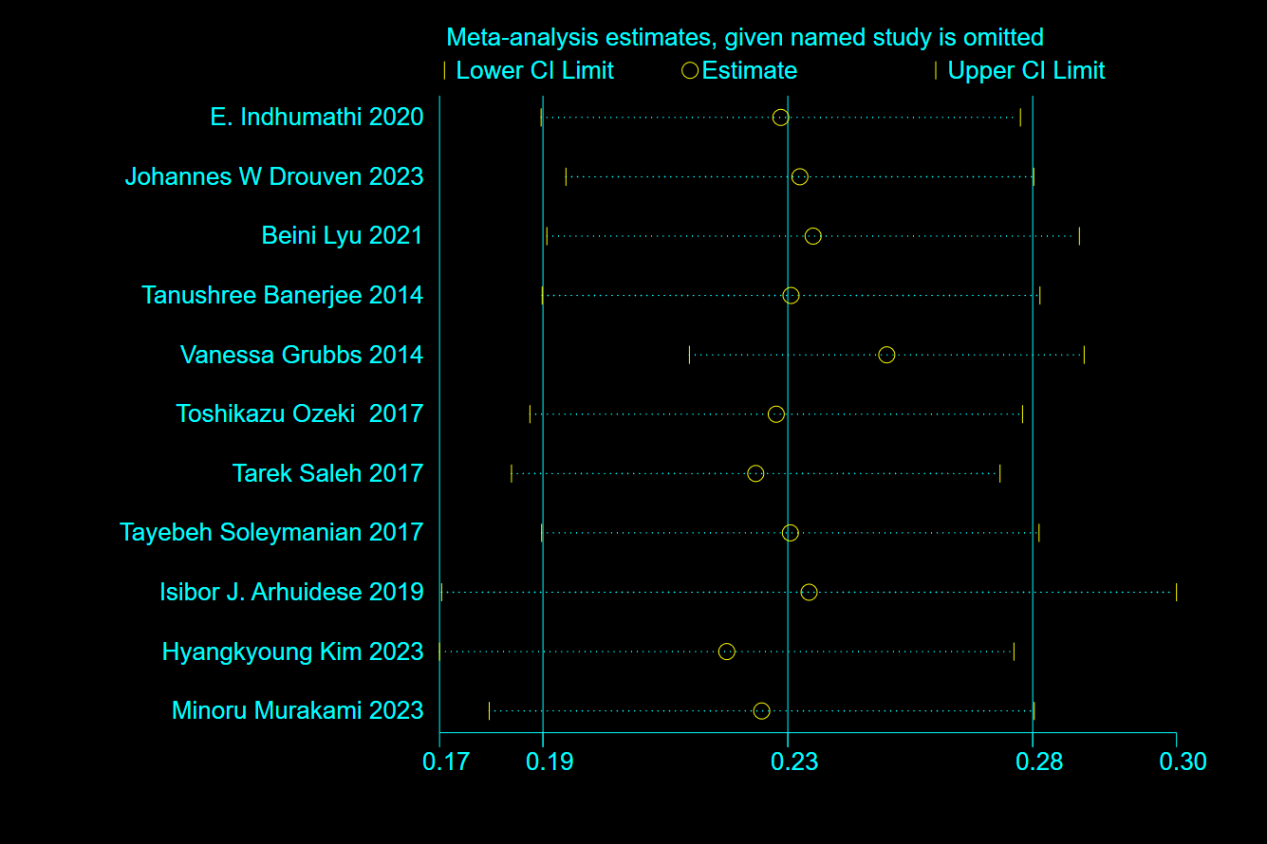

Supplement: Supplementary file 2 [file d88a7d706fb8a0a2638d4903.docx]
